# Supplementary material for: Molecular heterogeneity of glioblastomas: does location matter?
Source: PubMed Central journal article supplement (PMC4808041; doi:10.18632/oncotarget.6433), 2015-11-30
Supplement: oncotarget-07-0902-s001.pdf [file oncotarget-07-0902-s001.pdf]

## SUPPLEMENTARY TABLES

Supplementary Table S1: Mean RNA expression according to the five locations and for the entire population

| Markers |      | Expression level |       |         |        |        |        |
|---------|------|------------------|-------|---------|--------|--------|--------|
|         |      | C-FP             | C-T   | PV-FP   | PV-T   | PV-O   | Global |
| VEGFC   | Mean | 48,9             | 31,5  | 118,3   | 176,3  | 50,6   | 95,5   |
|         | SEM  | 9,82             | 4,9   | 34,4    | 44,7   | 12,1   | 11,2   |
| FLT4    | Mean | 355,11           | 442,8 | 429,6   | 411,9  | 252,6  | 409,7  |
|         | SEM  | 61,3             | 95,9  | 67,1    | 70,2   | 29,3   | 26,7   |
| MET     | Mean | 18,4             | 13,2  | 23,6    | 19,5   | 419,3  | 69,3   |
|         | SEM  | 5,6              | 3,7   | 4,1     | 4,9    | 292,9  | 37,1   |
| HGF     | Mean | 191,5            | 190,2 | 359,2   | 349,9  | 268,9  | 313,8  |
|         | SEM  | 43,9             | 154,9 | 104,1   | 57,9   | 60,9   | 45,2   |
| CHI3L1  | Mean | 7965,2           | 4146  | 14855,3 | 2541,4 | 9397,9 | 8204,3 |
|         | SEM  | 1645,2           | 586,4 | 4490,1  | 651,6  | 4094   | 1095,9 |
| PROM1   | Mean | 103,5            | 132,9 | 81,4    | 219,3  | 145,8  | 139    |
|         | SEM  | 24,9             | 34,8  | 30,2    | 55,5   | 34,1   | 16,1   |
| NOTCH1  | Mean | 316,8            | 207,5 | 240,9   | 435,5  | 310,6  | 313,1  |
|         | SEM  | 75,2             | 41,4  | 39,9    | 70,7   | 61,1   | 23,8   |
| DLL3    | Mean | 264,9            | 135,8 | 357,8   | 390,7  | 232,7  | 365,1  |
|         | SEM  | 69,8             | 41,7  | 154,8   | 113,1  | 71,4   | 56,6   |
| PDGFRA  | Mean | 507,4            | 258,2 | 3311,4  | 2433,2 | 1762,8 | 1209,9 |
|         | SEM  | 216,2            | 95,7  | 2195,8  | 1797,9 | 1024,9 | 404,5  |
| BCAN    | Mean | 660,4            | 498,8 | 656,1   | 617,5  | 534,2  | 708,7  |
|         | SEM  | 103,9            | 121,7 | 221,7   | 158,8  | 140,2  | 68,7   |

Data are expressed as mean with Standard Error of the Mean (SEM).

Abbreviations: Cortical fronto-parietal (C-FP), Cortical temporal (C-T), Periventricular fronto-parietal (PV-FP), Periventricular temporal (PV-T), Periventricular occipital (PV-O)

Supplementary Table S2: RNA expression according to the periventricular tumor locations (Mann-Whitney test)

|      | <i>VEGFC</i> |              | <i>FLT4</i>  |       | <i>PROM1</i> |       | <i>NOTCH1</i> |      | <i>CHI3L1</i> |       |
|------|--------------|--------------|--------------|-------|--------------|-------|---------------|------|---------------|-------|
|      | PV-FP        | PV-O         | PV-FP        | PV-O  | PV-FP        | PV-O  | PV-FP         | PV-O | PV-FP         | PV-O  |
| PV-T | 0,198        | <b>0,004</b> | 0,755        | 0,104 | <b>0,033</b> | 0,695 | <b>0,028</b>  | 0,19 | <b>0,006</b>  | 0,169 |
| PV-O | <b>0,032</b> | -            | <b>0,037</b> | -     | 0,059        | -     | 0,566         | -    | 0,235         | -     |

P-values are presented. Bold entries indicate significant results.

Abbreviations: Periventricular fronto-parietal (PV-FP), Periventricular temporal (PV-T), Periventricular occipital (PV-O)

**Supplementary Table S3: Correlation of RNA expression (Spearman test)**

|                 | MET          | HGF         | NOTCH1      | FLT4        | PDGFRA      | BCAN         | VEGFC       | PROM1        | CHI3L1       |               |
|-----------------|--------------|-------------|-------------|-------------|-------------|--------------|-------------|--------------|--------------|---------------|
| <u>SCC</u>      | <u>-,330</u> | ,141        | <u>,487</u> | <u>,289</u> | <u>,353</u> | <u>,639</u>  | -,166       | <u>,654</u>  | <u>-,543</u> | <b>DLL3</b>   |
| <i>P-values</i> | 0,011        |             | <0,001      | 0,026       | 0,006       | <0,001       |             | <0,001       | <0,001       |               |
| <u>SCC</u>      |              | <u>,324</u> | -,172       | -,101       | -,136       | <u>-,360</u> | <u>,296</u> | <u>-,313</u> | <u>,395</u>  | <b>MET</b>    |
| <i>P-values</i> |              | 0,012       |             |             |             | 0,005        | 0,023       | 0,016        | 0,002        |               |
| <u>SCC</u>      |              |             | <u>,275</u> | ,122        | -,001       | ,015         | <u>,473</u> | ,147         | -,041        | <b>HGF</b>    |
| <i>P-values</i> |              |             | 0,035       |             |             |              | <0,001      |              |              |               |
| <u>SCC</u>      |              |             |             | <u>,421</u> | <u>,276</u> | <u>,562</u>  | ,121        | <u>,477</u>  | <u>-,384</u> | <b>NOTCH1</b> |
| <i>P-values</i> |              |             |             | 0,001       | 0,035       | <0,001       |             | <0,001       | 0,003        |               |
| <u>SCC</u>      |              |             |             |             | ,032        | <u>,297</u>  | <u>,422</u> | ,179         | -,027        | <b>FLT4</b>   |
| <i>P-values</i> |              |             |             |             |             | 0,022        | 0,001       |              |              |               |
| <u>SCC</u>      |              |             |             |             |             | <u>,207</u>  | -,092       | <u>,292</u>  | <u>-,482</u> | <b>PDGFRA</b> |
| <i>P-values</i> |              |             |             |             |             |              |             | 0,025        | <0,001       |               |
| <u>SCC</u>      |              |             |             |             |             |              | -,186       | <u>,463</u>  | <u>-,401</u> | <b>BCAN</b>   |
| <i>P-values</i> |              |             |             |             |             |              |             | <0,001       | 0,002        |               |
| <u>SCC</u>      |              |             |             |             |             |              |             | -,194        | ,174         | <b>VEGFC</b>  |
| <i>P-values</i> |              |             |             |             |             |              |             |              |              |               |
| <u>SCC</u>      |              |             |             |             |             |              |             |              | <u>-,535</u> | <b>PROM1</b>  |
| <i>P-values</i> |              |             |             |             |             |              |             |              | <0,001       |               |

Significant spearman correlation coefficients (SCC) are underlined. *P-values* are below the data.

**Supplementary Table S4: Sequences of primers used in RT-qPCR**

| Name          | Sequence                                                               | Size/bp |
|---------------|------------------------------------------------------------------------|---------|
| <i>18S</i>    | F: 5'-CTACCACATCCAAGGAAGGCA-3'<br>R: 5'-TTTTTCGTCACCTACCTCCCCG-3'      | 71      |
| <i>GAPDH</i>  | F: 5'-CAAATTCATGGCACCGTC-3'<br>R: 5'-CCCACTTGATTTTGGAGGGA-3'           | 101     |
| <i>ACTB</i>   | F: 5'-CCACACTGTGCCCATCTACG-3'<br>R: 5'-AGGATCTTCATGAGGTAGTCAGTCAG-3'   | 99      |
| <i>VEGFC</i>  | F: 5'-GATGCCTGGCTCAGGAAGA-3'<br>R: 5'-TGTCATGGAATCCATCTCTGTTGA-3'      | 72      |
| <i>FLT4</i>   | F: 5'-GGGCTTCTCCAGACCAAGA-3'<br>R: 5'-ACAAGATCTCCATGGTCAGC-3'          | 44      |
| <i>MET</i>    | F: 5'-AAATGTGCATGAAGCAGGAA-3'<br>R: 5'-TCTCTGAATTAGAGCGATGTT-3'        | 62      |
| <i>HGF</i>    | F: 5'-TGATCCAAACATCCGAGTTG-3'<br>R: 5'-GCCATTCCCACGATAACAAT-3'         | 85      |
| <i>CHI3L1</i> | F: 5'-GGGACCCTTGCCTACTATGA-3'<br>R: 5'-CGAGGATTCTATGGACTGTGG-3'        | 64      |
| <i>PROM1</i>  | F: 5'-GGGAGAACAATAATAGGATATTTTGAA-3'<br>R: 5'-CGATGCCACTTTCTCACTGAT-3' | 75      |
| <i>NOTCH1</i> | F: 5'-CGGGGCTAACAAAGATATGC-3'<br>R: 5'-CACCTTGGCGGTCTCGTA-3'           | 88      |
| <i>DLL3</i>   | F: 5'-CAACTGTGAGAAGAGGGTGA-3'<br>R: 5'-CCAGGTCCAGGCAGAGTC-3'           | 71      |
| <i>PDGFRA</i> | F: 5'-TGGTTGAAGGAACAGCCTATGG-3'<br>R: TGGCCGTGGGTTTTAGCAT-3'           | 81      |
| <i>BCAN</i>   | QUANTITECT (Ref: QT00088550)                                           | 144     |

Forward (F)/Reverse (R) primers and size of corresponding amplified fragment for each gene are listed. PCR conditions were as follows: 10 min at 95°C, followed by 35 cycles of 15 s at 95°C, 30 s at 67°C for *18S* or 45 cycles of 15 s at 95°C, 30 s at 65°C for *GAPDH*, *ACTB*, *VEGFC* and *FLT4* or 20 s at 60°C for *MET*, *HGF* and *NOTCH1* or 30 s at 60°C for *CHI3L1*, *PROM1*, *PDGFRA* and *BCAN* or 20 s at 67°C for *DLL3*.
